# Supplementary material for: Influence of Glycomacropeptide on Rehydration Characteristics of Micellar Casein Concentrate Powder
Source: MDPI journal article supplement (doi:10.3390/foods10081960), 2021-08-23
Supplement: s1 [file s1]

## Supplementary data

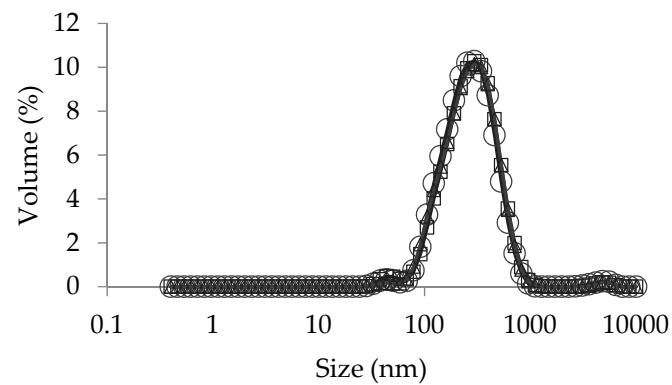

**Figure S1.** Distribution of casein micelle size in mixed micellar casein concentrate (MCC) and glycomacropeptide (GMP) protein solutions: ○; S-MCC-0G, □; S-MCC-10G, and △; S-MCC-20G mixed with 0, 10 and 20% GMP as % of total protein, respectively.

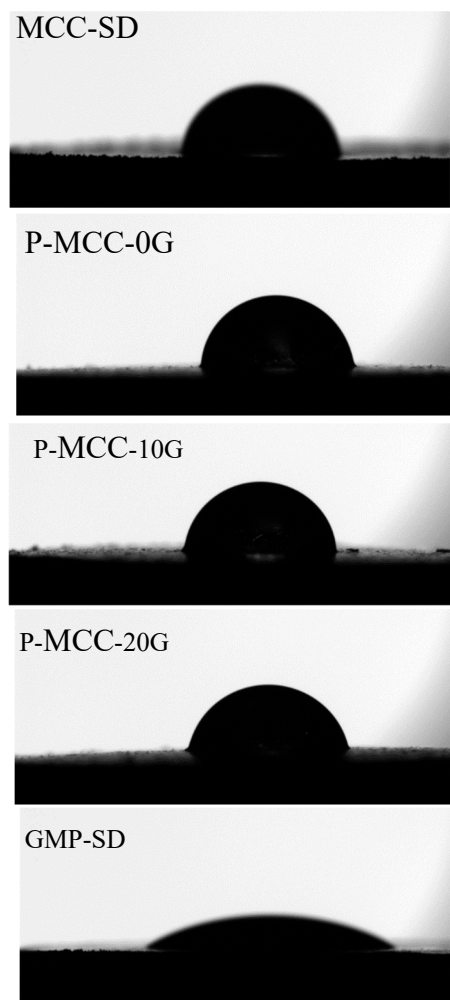

**Figure S2.** Representative images of water droplet on the surface of powder tablets: MCC-SD (spray-dried original powder), P-MCC-0G (freeze-dried MCC powder without GMP addition), P-MCC-10G (Freeze-dried MCC prepared with 10% GMP as a % of total protein), P-MCC-20G (freeze-dried MCC prepared with 20% GMP as a % of total protein), GMP-SD (original spray-dried GMP powder) at 50 S.

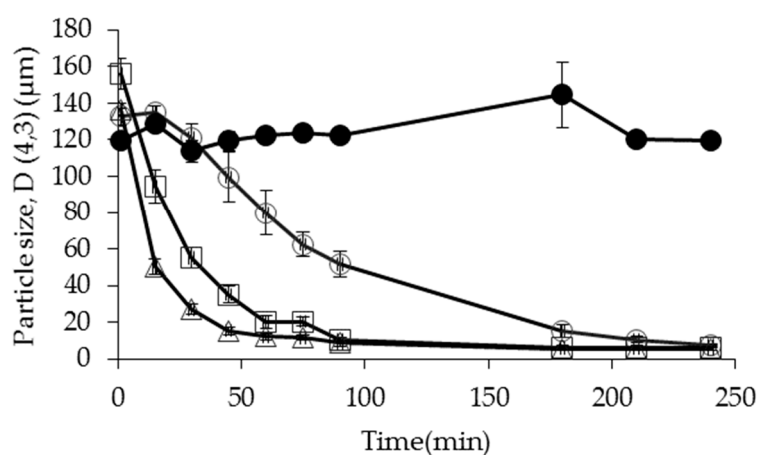

**Figure S3.** Volume-weighted mean particle size ( $D_{4,3}$ ) of micellar casein powders:  $\circ$ ; P-MCC-0G,  $\square$ ; P-MCC-10G, and  $\Delta$ ; P-MCC-20G obtained from micellar casein concentrate mixed with GMP prior to drying including original spray-dried MCC powder ( $\bullet$ ; MCC-SD). The mean particle size values are shown as a function of rehydration time from 1 to 240 min and error bars are standard error.

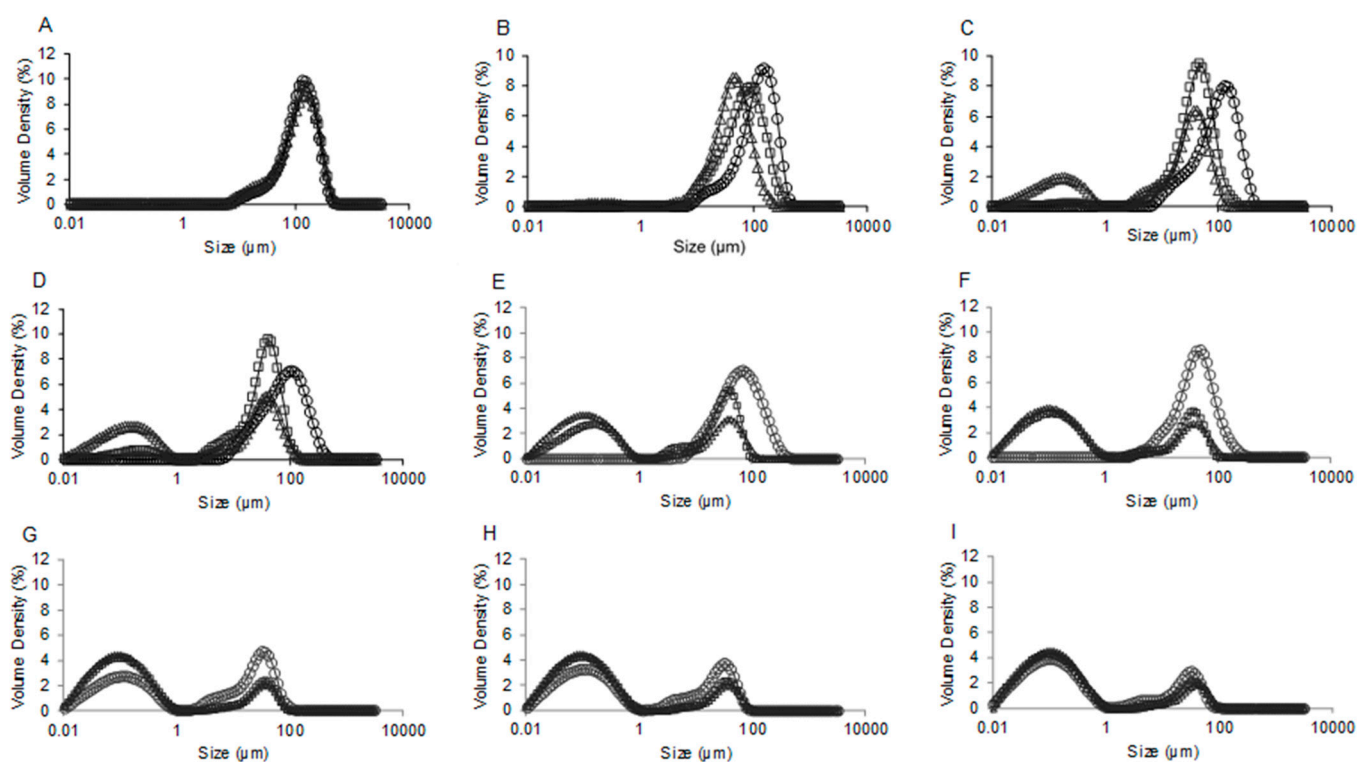

**Figure S4.** Particle size distribution data of micellar casein powders:  $\circ$ ; P-MCC-0G,  $\square$ ; P-MCC-10G,  $\Delta$ ; P-MCC-20G obtained from micellar casein mixed with GMP at 0, 10 and 20% as of total protein prior to drying. The PSD data are shown as a function of rehydration time: A (1 min), B (15 min), C (30 min), D (45 min), E (60 min), F (90 min), G (180 min), H (210 min) and I (240 min).
